# Supplementary material for: West Nile virus in California, 2003–2018: A persistent threat
Source: PLoS Negl Trop Dis. 2020 Nov 18;14(11):e0008841. doi: 10.1371/journal.pntd.0008841 (PMC7710070; doi:10.1371/journal.pntd.0008841)
Supplement: S1 Table — Symptomatic (S) and asymptomatic (A) West Nile virus (WNV) infections, and 16-year cumulative incidence of WNV disease by county of residence, California, 2003–2018. (XLSX) [file pntd.0008841.s001.xlsx]

## Sheet: Sheet1
	2003		2004		2005		2006		2007		2008		2009		2010		2011		2012		2013		2014		2015		2016		2017		2018		Total		Incidence*
	S	A	S	A	S	A	S	A	S	A	S	A	S	A	S	A	S	A	S	A	S	A	S	A	S	A	S	A	S	A	S	A	S	A
Alameda	-	-	-	-	1	-	1	-	-	-	1	-	-	-	1	-	-	-	2	-	-	2	2	1	-	-	-	-	1	1	-	-	9	4	0.54
Alpine	-	-	-	-	-	-	-	-	-	-	-	-	-	-	-	-	-	-	-	-	-	-	-	-	-	-	-	-	-	-	-	-	0	0	0
Amador	-	-	-	-	3	1	-	-	-	1	-	-	-	-	-	-	1	-	-	-	-	-	-	-	-	-	1	-	-	-	1	-	6	2	15.75
Butte	-	-	7	-	24	1	31	3	16	-	6	1	2	-	1	-	3	1	10	-	23	1	25	1	53	5	22	-	4	-	12	6	239	19	105
Calaveras	-	-	-	-	2	-	-	-	-	-	1	-	-	-	-	1	-	-	-	-	-	-	-	-	-	-	-	-	-	-	-	-	3	1	6.64
Colusa	-	-	-	-	2	-	4	-	2	-	1	-	-	-	-	-	-	-	3	-	2	-	5	-	1	-	2	-	-	-	-	-	22	0	99.56
Contra Costa	-	-	-	-	11	-	8	-	3	-	4	1	5	-	4	1	3	-	4	-	5	-	5	2	1	-	4	-	3	-	4	1	64	5	5.57
Del Norte	-	-	-	-	-	-	-	-	-	-	-	-	-	-	-	-	-	-	-	-	-	-	-	-	-	-	-	-	-	-	-	-	0	0	0
El Dorado	-	-	-	-	1	-	2	-	-	-	1	-	1	-	-	1	1	-	-	-	1	-	-	-	-	-	1	-	-	-	-	-	8	1	4.25
Fresno	-	-	12	3	59	9	11	1	17	8	3	-	13	4	23	5	9	3	24	5	8	2	43	14	8	5	14	6	13	2	14	1	271	68	26.91
Glenn	-	-	3	-	13	-	12	-	7	-	1	-	-	-	2	-	1	-	7	2	9	-	12	-	20	1	6	-	-	-	2	-	95	3	329.91
Humboldt	-	-	-	-	1	-	-	-	-	-	-	-	-	-	-	-	-	-	-	1	-	1	-	-	-	-	-	-	-	1	1	-	2	3	1.47
Imperial	1	-	1	-	1	-	1	-	3	-	-	-	-	-	-	-	-	-	1	-	-	1	2	-	1	-	-	-	3	1	-	-	14	2	7.34
Inyo	-	-	-	-	-	-	-	-	-	-	-	-	-	-	-	-	-	-	-	-	-	-	-	-	-	-	-	-	4	-	-	-	4	0	21.53
Kern	-	-	60	1	67	1	49	2	141	7	2	-	18	3	15	-	18	-	25	3	25	5	13	4	12	-	17	-	30	7	13	1	505	34	55.75
Kings	-	-	-	-	32	-	1	-	7	2	2	-	3	-	1	1	1	1	4	-	1	-	5	1	-	-	8	-	5	-	-	-	70	5	46.16
Lake	-	-	1	-	-	-	2	-	-	-	-	-	-	-	-	-	-	-	1	-	-	-	1	-	2	-	1	-	-	-	1	-	9	0	13.83
Lassen	-	-	1	-	-	-	-	-	-	-	-	-	-	-	-	-	-	-	-	-	-	-	-	-	-	-	-	-	-	-	-	-	1	0	3.24
Los Angeles	1	-	314	18	40	7	13	3	36	9	156	39	20	5	4	-	58	5	163	20	151	22	258	28	289	34	151	16	277	19	43	4	1974	229	19.2
Madera	-	-	-	-	18	1	-	-	2	-	-	-	1	-	7	3	2	-	3	-	3	1	3	-	4	-	6	1	2	-	4	-	55	6	34.61
Marin	-	-	-	-	-	-	1	-	-	-	-	-	-	-	-	-	-	-	-	-	2	1	-	-	1	-	-	-	-	-	-	-	4	1	1.52
Mariposa	-	-	-	-	-	-	-	-	-	-	-	-	-	-	-	-	-	-	-	-	-	-	-	-	-	-	-	-	-	-	-	-	0	0	0
Mendocino	-	-	-	-	-	-	-	-	2	-	-	-	-	-	-	-	-	-	-	-	-	-	1	-	2	-	-	-	-	-	-	-	5	0	5.6
Merced	-	-	1	-	25	3	4	-	4	-	1	-	4	-	1	1	1	-	13	-	-	-	2	1	1	1	15	2	14	1	2	-	88	9	31.43
Modoc	-	-	-	-	-	-	2	-	-	-	-	-	-	-	-	-	-	-	-	-	-	-	-	-	-	-	-	-	-	-	-	-	2	0	20.81
Mono	-	-	-	-	-	-	1	-	-	-	-	-	-	-	-	-	-	-	-	-	-	-	-	-	-	-	-	-	-	-	-	-	1	0	7.23
Monterey	-	-	-	-	-	-	-	-	-	-	-	-	1	-	-	-	-	-	1	-	-	-	-	-	-	-	1	-	-	-	1	-	4	0	0.9
Napa	-	-	-	-	-	-	1	-	1	-	-	-	-	-	-	-	-	-	-	-	1	-	-	-	-	1	-	1	-	-	1	-	4	2	2.83
Nevada	-	-	-	-	4	-	1	-	-	-	-	-	-	-	-	-	-	-	-	-	-	-	-	-	2	-	-	-	-	-	1	-	8	0	8.07
Orange	-	-	62	3	17	-	6	1	9	1	71	8	4	2	1	-	11	-	42	6	10	2	267	17	92	10	33	3	33	5	9	3	667	61	20.71
Placer	-	-	1	-	35	-	8	-	4	-	7	-	-	-	4	-	1	-	12	-	5	1	8	2	1	-	8	-	-	2	9	-	103	5	26.44
Plumas	-	-	-	-	1	-	-	-	-	-	-	-	-	-	-	-	-	-	-	-	-	-	-	-	-	-	-	-	-	-	-	-	1	0	5.06
Riverside	1	-	111	5	103	1	4	-	18	1	62	2	3	2	-	-	7	4	19	-	35	7	16	1	133	13	11	1	32	4	15	1	570	42	23.59
Sacramento	-	-	3	-	163	14	15	1	25	1	13	4	-	-	12	1	4	-	29	3	14	4	14	1	5	2	25	4	6	-	15	2	343	37	22.43
San Benito	-	-	-	-	-	-	-	-	-	-	-	-	-	-	-	-	-	-	-	-	-	-	-	-	-	-	-	-	-	-	-	-	0	0	0
San Bernardino	-	-	188	9	33	2	3	-	4	1	36	7	2	-	5	-	4	3	33	6	13	4	21	10	54	7	8	-	57	9	9	1	470	59	21.61
San Diego	-	-	2	-	1	-	1	-	15	-	35	1	4	-	-	-	-	-	1		-	-	11	4	42	3	20	4	2	-	2	-	136	12	4.07
San Francisco	-	-	-	-	2	-	-	-	-	-	-	-	-	-	1	-	-	-	1	-	1	-	-	1	-	-	-	1	1	-	-	-	6	2	0.68
San Joaquin	-	-	2	1	34	2	8	-	10	-	12	3	10	3	6	1	6	1	13	2	8	2	9	2	2	-	13	2	14	-	14	1	161	20	21.22
San Luis Obispo	-	-	1	-	-	-	1	-	-	-	-	-	-	-	-	-	-	-	-	-	-	-	-	-	-	-	-	1	-	-	-	-	2	1	0.71
San Mateo	-	-	-	-	1	-	-	-	-	-	-	-	-	-	-	-	-	-	-	-	-	-	-	-	-	-	-	-	-	-	-	-	1	0	0.13
Santa Barbara	-	-	-	-	2	-	-	-	-	-	1	-	-	-	-	-	1	-	-	-	1	-	1	-	-	-	-	-	-	-	-	-	6	0	1.32
Santa Clara	-	-	1	-	5	-	5	-	4	-	1	-	-	-	-	-	1	-	-	-	2	1	12	4	8	-	1	-	-	-	1	-	41	5	2.1
Santa Cruz	-	-	-	-	-	-	-	-	-	-	-	-	-	-	-	-	1	-	-	-	-	-	1	-	-	-	-	-	-	-	-	-	2	0	0.72
Shasta	-	-	5	-	1	-	4	-	9	-	1	-	-	-	-	-	-	-	1	-	1	-	2	1	3	-	1	-	1	-	1	-	30	1	16.83
Sierra	-	-	-	-	-	-	-	-	-	-	-	-	-	-	-	-	-	-	-	-	-	-	-	-	-	-	-	-	-	-	-	-	0	0	0
Siskiyou	-	-	-	-	-	-	-	-	-	-	-	-	-	-	-	-	-	-	-	-	-	-	-	-	1	-	-	-	-	-	-	-	1	0	2.24
Solano	-	-	-	-	5	-	8	1	1	-	1	1	-	-	-	-	-	-	2	-	1	-	5	-	3	1	4	-	1	-	-	-	31	3	7.05
Sonoma	-	-	-	-	1	-	-	-	1	-	-	-	-	-	-	-	-	-	-	-	-	-	-	-	-	-	-	-	-	-	-	-	2	0	0.4
Stanislaus	-	-	-	-	84	8	11	1	21	3	17	1	14	-	12	-	11	-	26	2	20	2	40	5	14	-	26	4	28	3	15	3	339	32	61.01
Sutter	-	-	-	-	9	-	12	-	3	-	-	-	-	-	-	-	-	-	8	-	10	-	9	1	2	-	12	2	2	-	1	-	68	3	69.93
Tehama	-	-	10	-	4	-	6	1	4	-	4	1	-	-	-	-	1	-	4	-	5	-	4	-	6	1	6	-	2	-	2	1	58	4	90.57
Trinity	-	-	-	-	-	-	-	-	-	-	-	-	-	-	-	-	-	-	-	-	-	-	-	-	-	-	-	-	-	-	-	-	0	0	0
Tulare	-	-	3	-	56	4	6	-	10	-	5	-	4	8	12	3	11	2	7	2	7	4	21	4	13	2	10	1	12	1	8	-	185	31	38.88
Tuolumne	-	-	-	-	1	-	-	-	-	-	-	-	-	-	-	-	-	-	-	-	-	-	-	-	-	-	-	-	-	-	1	-	2	0	3.65
Ventura	-	-	1	-	1	-	3	2	1	-	-	-	-	1	-	-	-	-	7	-	2	-	3	1	6	-	7	-	1	-	2		34	4	3.96
Yolo	-	-	1	-	11	1	27	1	2	-	1	-	2	-	-	-	-	-	10	1	9	-	16	-	8	1	16	4	6	-	11	1	120	9	54.23
Yuba	-	-	-	-	6	-	5	2	-	-	-	1	1	-	-	1	2	-	4	-	14	-	6	1	10	-	11	-	2	-	2	-	63	5	84.31
Subtotal	3	0	791	40	880	55	278	19	382	34	446	70	112	28	112	19	159	20	480	53	389	63	843	107	800	87	461	53	556	56	217	26	6909	730	17.36
California	3		831		935		297		416		516		140		131		179		533		452		950		887		514		612		243		7639
NT = None tested
* Cumulative incidence per 100,000 population was calculated as the total number of symptomatic infections between 2003 and 2018 using population estimates from the California Department of Finance
