# Supplementary material for: West Nile virus in California, 2003–2018: A persistent threat
Source: PLoS Negl Trop Dis. 2020 Nov 18;14(11):e0008841. doi: 10.1371/journal.pntd.0008841 (PMC7710070; doi:10.1371/journal.pntd.0008841)
Supplement: S6 Table — (XLSX) [file pntd.0008841.s006.xlsx]

## Sheet: Sheet1
Species	Positive (n)*	Proportion of all positive birds (%)	Tested (n)¥	Proportion of all tested birds
American Crow	13154	0.564	23878	0.403
Corvus brachyrhynchos
California Scrub-jay	4048	0.174	7330	0.124
Aphelocoma californica
Yellow-billed Magpie	1337	0.057	1883	0.032
Pica nuttalli
House Finch	820	0.035	3379	0.057
Haemorhous mexicanus
House Sparrow	424	0.018	2567	0.043
Passer domesticus
American Robin	295	0.013	1497	0.025
Turdus migratorius
Northern Mockingbird	219	0.009	1079	0.018
Mimus polyglottos
Common Raven	214	0.009	1283	0.022
Corvus corax
Steller's Jay	175	0.007	519	0.009
Cyanocitta stelleri
Cooper's Hawk	169	0.007	946	0.016
Accipiter cooperii
Mourning Dove	121	0.005	1268	0.021
Zenaida macroura
Lesser Goldfinch	110	0.005	591	0.01
Carduelis psaltria
European Starling	101	0.004	1195	0.02
Sturnus vulgaris
Red-tailed Hawk	99	0.004	413	0.007
Buteo jamaicensis
Undifferentiated sparrows	94	0.004	658	0.011
California	21380	0.928	48486	0.818
* 23,322 birds tested positive for WNV between 2003 and 2018.
¥ 59,215 birds were tested for WNV between 2003 and 2018
