# Supplementary material for: West Nile virus in California, 2003–2018: A persistent threat
Source: PLoS Negl Trop Dis. 2020 Nov 18;14(11):e0008841. doi: 10.1371/journal.pntd.0008841 (PMC7710070; doi:10.1371/journal.pntd.0008841)
Supplement: S7 Table — (XLSX) [file pntd.0008841.s007.xlsx]

## Sheet: Sheet1
Year	2003		2004		2005		2006		2007		2008		2009		2010		2011		2012		2013		2014		2015		2016		2017		2018
County	F	S	F	S	F	S	F	S	F	S	F	S	F	S	F	S	F	S	F	S	F	S	F	S	F	S	F	S	F	S	F	S
Alameda	3	0	3	0	3	0	3	0	3	0	2	0	2	0	2	0	2	0	0	NT	3	0	3	1	2	0	2	0	2	0	2	0
Alpine	0	NT	0	NT	0	NT	0	NT	0	NT	0	NT	0	NT	0	NT	0	NT	0	NT	0	NT	0	NT	0	NT	0	NT	0	NT	0	NT
Amador	0	NT	0	NT	0	NT	0	NT	0	NT	0	NT	0	NT	0	NT	0	NT	0	NT	0	NT	0	NT	0	NT	0	NT	0	NT	0	NT
Butte	7	0	7	50	7	15	7	49	7	32	7	31	7	35	7	7	7	20	7	45	7	57	7	37	7	37	7	38	7	31	7	37
Calaveras	0	NT	0	NT	1	1	1	0	1	0	1	9	1	0	1	0	1	0	1	0	1	0	1	0	1	0	1	0	1	1	1	0
Colusa	1	0	1	0	1	3	1	1	1	2	1	1	1	0	1	4	1	0	1	6	1	8	1	9	1	10	1	9	1	0	1	6
Contra Costa	4	0	4	0	5	18	5	25	5	5	5	15	5	13	5	4	5	0	5	7	5	7	5	15	5	18	5	5	5	7	5	16
Del Norte	0	NT	0	NT	0	NT	0	NT	0	NT	0	NT	0	NT	0	NT	0	NT	0	NT	0	NT	0	NT	0	NT	0	NT	0	NT	0	NT
El Dorado	0	NT	0	NT	0	NT	0	NT	0	NT	0	NT	0	NT	0	NT	0	NT	0	NT	0	NT	0	NT	0	NT	0	NT	0	NT	0	NT
Fresno	9	0	10	25	10	46	10	37	10	46	10	24	4	17	4	7	0	NT	0	NT	0	NT	0	NT	0	NT	0	NT	0	NT	0	NT
Glenn	2	0	2	19	1	9	1	10	1	8	1	5	1	3	1	0	1	5	1	8	1	9	1	9	1	10	1	10	1	1	1	0
Humboldt	0	NT	0	NT	0	NT	0	NT	0	NT	0	NT	0	NT	0	NT	0	NT	0	NT	0	NT	0	NT	0	NT	0	NT	0	NT	0	NT
Imperial	6	54	7	56	9	62	7	58	7	17	6	26	6	41	1	15	1	3	1	10	0	NT	0	NT	0	NT	0	NT	0	NT	0	NT
Inyo	3	0	3	0	0	NT	0	NT	0	NT	0	NT	0	NT	0	NT	0	NT	0	NT	0	NT	0	NT	0	NT	0	NT	0	NT	0	NT
Kern	14	0	15	101	15	116	15	101	15	82	16	18	16	102	16	86	16	139	11	74	3	12	1	NT	1	0	1	0	0	NT	0	NT
Kings	3	0	4	2	4	20	4	27	4	22	4	1	0	NT	0	NT	0	NT	0	NT	0	NT	0	NT	0	NT	0	NT	0	NT	0	NT
Lake	2	0	2	1	2	4	2	6	2	2	2	1	2	1	2	0	2	0	2	4	2	6	2	5	2	4	2	5	2	2	2	1
Lassen	0	NT	0	NT	0	NT	0	NT	0	NT	0	NT	0	NT	0	NT	0	NT	0	NT	0	NT	0	NT	0	NT	0	NT	0	NT	0	NT
Los Angeles	45	0	48	167	49	71	48	38	49	27	46	134	47	40	47	2	46	86	47	135	47	152	47	146	47	137	47	126	48	145	28	30
Madera	2	0	2	0	2	7	2	12	2	4	2	2	2	7	2	9	0	0	0	0	2	2	0	NT	0	NT	0	NT	0	NT	0	NT
Marin	5	0	3	0	3	0	2	2	2	0	1	0	2	0	1	0	1	0	1	0	1	1	1	0	1	0	0	NT	0	NT	0	NT
Mariposa	0	NT	0	NT	0	NT	0	NT	0	NT	0	NT	0	NT	0	NT	0	NT	0	NT	0	NT	0	NT	0	NT	0	NT	0	NT	0	NT
Mendocino	0	NT	0	NT	0	NT	0	NT	0	NT	0	NT	0	NT	0	NT	0	NT	0	NT	0	NT	0	NT	0	NT	0	NT	0	NT	0	NT
Merced	6	0	6	0	8	15	8	15	8	11	8	3	8	14	8	8	7	15	7	14	7	21	7	11	8	23	8	35	8	19	8	16
Modoc	0	NT	0	NT	0	NT	0	NT	0	NT	0	NT	0	NT	0	NT	0	NT	0	NT	0	NT	0	NT	0	NT	0	NT	0	NT	0	NT
Mono	0	NT	0	NT	0	NT	0	NT	0	NT	0	NT	0	NT	0	NT	0	NT	0	NT	0	NT	0	NT	0	NT	0	NT	0	NT	0	NT
Monterey	1	0	3	0	3	0	2	0	2	0	2	0	3	0	2	0	2	0	2	0	2	0	2	0	2	0	0	NT	0	NT	0	NT
Napa	2	0	6	0	5	2	3	0	3	0	3	0	3	3	3	0	0	NT	0	NT	0	NT	1	0	0	NT	0	NT	0	NT	1	0
Nevada	0	NT	0	NT	2	0	2	0	3	0	2	0	2	0	2	0	2	0	2	0	2	2	4	2	4	4	4	1	4	0	4	0
Orange	1	0	1	3	1	2	1	0	1	1	1	3	0	NT	1	0	0	NT	0	NT	0	NT	0	NT	0	NT	0	NT	0	NT	0	NT
Placer	5	0	6	25	7	2	7	11	7	13	8	11	8	11	8	4	8	6	8	8	4	16	0	NT	2	8	2	7	2	5	2	4
Plumas	0	NT	0	NT	0	NT	0	NT	0	NT	0	NT	0	NT	0	NT	0	NT	0	NT	0	NT	0	NT	0	NT	0	NT	0	NT	0	NT
Riverside	22	16	22	158	21	160	21	27	22	44	23	118	20	37	22	44	22	41	22	63	21	44	22	43	15	22	0	0	0	NT	0	NT
Sacramento	5	0	6	15	5	9	5	13	8	19	8	7	3	2	9	6	9	7	9	36	3	6	3	10	2	2	2	3	2	2	2	5
San Benito	0	NT	0	NT	0	NT	0	NT	0	NT	1	0	1	0	1	0	1	0	1	0	1	1	1	0	1	0	1	0	1	1	1	1
San Bernardino	12	0	16	108	18	90	17	28	18	35	18	62	18	14	19	11	18	42	16	45	16	29	17	35	9	36	10	23	9	36	0	NT
San Diego	3	0	3	0	3	0	4	0	4	1	4	15	4	5	2	0	2	0	2	0	2	0	2	2	3	12	2	9	0	NT	0	NT
San Francisco	0	NT	0	NT	0	NT	0	NT	0	NT	0	NT	0	NT	0	NT	0	NT	0	NT	0	NT	0	NT	0	NT	0	NT	0	NT	0	NT
San Joaquin	5	0	6	11	6	17	5	19	4	24	2	18	1	10	1	1	0	NT	0	NT	0	NT	0	NT	0	NT	0	NT	0	NT	0	NT
San Luis Obispo	2	0	3	0	3	4	0	NT	0	NT	0	NT	0	NT	0	NT	0	NT	0	NT	0	NT	0	NT	0	NT	0	NT	0	NT	0	NT
San Mateo	3	0	3	0	5	0	2	0	1	0	1	0	1	0	1	0	1	0	1	0	2	0	3	0	3	0	3	0	3	0	2	0
Santa Barbara	5	0	6	0	6	8	5	0	4	0	4	0	5	0	5	0	5	0	5	0	5	0	5	0	5	0	5	0	5	4	5	0
Santa Clara	4	0	4	4	4	0	5	1	2	0	4	0	5	0	7	0	7	0	7	0	7	2	7	6	8	5	8	1	8	0	8	8
Santa Cruz	1	0	1	0	1	0	2	0	2	0	2	0	2	0	2	0	2	0	2	0	2	0	2	0	2	0	2	0	2	0	2	0
Shasta	7	0	7	5	7	9	7	4	7	7	7	3	7	0	7	0	7	0	7	6	7	21	7	12	7	22	7	3	7	4	7	4
Sierra	0	NT	0	NT	0	NT	0	NT	0	NT	0	NT	0	NT	0	NT	0	NT	0	NT	0	NT	0	NT	0	NT	0	NT	0	NT	0	NT
Siskiyou	0	NT	0	NT	0	NT	0	NT	0	NT	0	NT	0	NT	0	NT	0	NT	0	NT	0	NT	0	NT	0	NT	0	NT	0	NT	0	NT
Solano	2	0	2	0	3	23	3	22	3	7	3	7	3	13	3	2	3	1	3	2	3	12	3	23	3	7	3	10	3	11	3	7
Sonoma	2	0	4	0	5	0	4	1	4	0	2	0	4	0	4	0	4	0	3	1	3	2	1	3	2	0	0	NT	0	NT	0	NT
Stanislaus	6	0	9	12	9	70	9	47	9	35	9	38	6	25	5	21	2	7	2	8	2	8	2	12	2	9	0	NT	0	NT	0	NT
Sutter	5	0	5	12	5	6	5	36	5	17	5	9	5	11	5	13	4	8	5	38	6	35	6	31	6	36	6	33	6	22	5	20
Tehama	2	0	2	12	2	1	3	3	3	8	3	0	3	2	3	1	3	0	3	0	3	8	3	13	3	18	3	8	3	4	3	1
Trinity	0	NT	0	NT	0	NT	0	NT	0	NT	0	NT	0	NT	0	NT	0	NT	0	NT	0	NT	0	NT	0	NT	0	NT	0	NT	0	NT
Tulare	8	0	9	11	9	54	6	22	6	27	8	20	6	28	4	26	1	7	2	11	2	5	1	4	0	NT	0	NT	0	NT	0	NT
Tuolumne	0	NT	0	NT	0	NT	0	NT	0	NT	0	NT	0	NT	0	NT	0	NT	0	NT	0	NT	0	NT	0	NT	0	NT	0	NT	0	NT
Ventura	5	0	5	1	5	5	5	1	5	1	5	4	5	0	5	0	5	0	5	2	5	0	5	0	5	11	5	0	5	0	5	0
Yolo	5	0	2	11	5	9	5	26	9	4	7	0	3	4	4	5	4	0	4	4	3	12	3	9	2	6	2	4	2	2	3	5
Yuba	2	0	2	0	2	10	2	9	2	10	2	1	2	0	2	5	2	4	2	13	2	11	2	9	2	11	2	13	2	8	2	2
California	227	70	250	809	262	868	246	651	251	511	246	586	224	438	225	281	204	391	197	540	183	489	178	447	164	448	142	343	139	305	110	163
NT = None tested
F = Chicken flocks (n)
S = seroconversions (n)
